# Supplementary material for: Mental Health Recovery of Evacuees and Residents from the Fukushima Daiichi Nuclear Power Plant Accident after Seven Years—Contribution of Social Network and a Desirable Lifestyle
Source: PubMed Central journal article supplement (PMC6265751; doi:10.3390/ijerph15112381), 2018-10-27
Supplement: ijerph-15-02381-s001.pdf [file ijerph-15-02381-s001.pdf]

## Supplementary

# Mental Health Recovery of Evacuees and Residents from the Fukushima Daiichi Nuclear Power Plant Accident after Seven Years—Contribution of Social Network and a Desirable Lifestyle

Masatsugu Orui, Satomi Nakajima, Yui Takebayashi, Akiko Ito, Maho Momoi, Masaharu Maeda, Seiji Yasumura and Hitoshi Ohto

**Table S1.** Disaster-related experience and current economic status (Evacuation/Non-evacuation area)

|                                                                    | Total<br>(n=333)<br>n (%) |        | Evacuees in<br>evacuation area<br>(n=160)<br>n (%) |        | Residents in non-<br>evacuation area<br>(n=173)<br>n (%) |        | p-value<br>( $\chi^2$ ) |
|--------------------------------------------------------------------|---------------------------|--------|----------------------------------------------------|--------|----------------------------------------------------------|--------|-------------------------|
| <i>Evacuation</i>                                                  |                           |        |                                                    |        |                                                          |        |                         |
| Experienced                                                        | 176                       | (52.9) | 149                                                | (93.1) | 27                                                       | (15.6) | <0.01                   |
| Never                                                              | 157                       | (47.1) | 11                                                 | (6.9)  | 146                                                      | (84.4) | ( $\chi^2=200.4$ )      |
| <i>Separation of family members due to a nuclear disaster</i>      |                           |        |                                                    |        |                                                          |        |                         |
| Experienced                                                        | 119                       | (35.7) | 88                                                 | (55.0) | 15                                                       | (8.7)  | <0.01                   |
| Never                                                              | 230                       | (69.1) | 72                                                 | (45.0) | 158                                                      | (91.3) | ( $\chi^2=83.5$ )       |
| <i>House damage (severe/partial collapse)</i>                      |                           |        |                                                    |        |                                                          |        |                         |
| Experienced                                                        | 117                       | (35.1) | 69                                                 | (43.1) | 48                                                       | (27.7) | <0.01                   |
| Never                                                              | 216                       | (64.9) | 91                                                 | (56.9) | 125                                                      | (72.3) | ( $\chi^2=8.63$ )       |
| <i>Loss of family, relatives or friends</i>                        |                           |        |                                                    |        |                                                          |        |                         |
| Experienced                                                        | 59                        | (17.7) | 46                                                 | (28.8) | 13                                                       | (7.5)  | <0.01                   |
| Never                                                              | 274                       | (82.3) | 114                                                | (71.3) | 160                                                      | (92.5) | ( $\chi^2=25.7$ )       |
| <i>Loss of employment due to disaster</i>                          |                           |        |                                                    |        |                                                          |        |                         |
| Experienced                                                        | 81                        | (24.3) | 61                                                 | (38.1) | 20                                                       | (11.6) | <0.01                   |
| Never                                                              | 252                       | (75.7) | 99                                                 | (61.9) | 153                                                      | (88.4) | ( $\chi^2=31.9$ )       |
| <i>Economic status (Afford to live in current economic status)</i> |                           |        |                                                    |        |                                                          |        |                         |
| Difficult                                                          | 110                       | (33.2) | 39                                                 | (24.5) | 71                                                       | (41.3) | <0.01                   |
| Enough/ Average                                                    | 221                       | (66.8) | 120                                                | (75.5) | 101                                                      | (58.7) | ( $\chi^2=10.4$ )       |

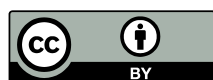

© 2018 by the authors. Submitted for possible open access publication under the terms and conditions of the Creative Commons Attribution (CC BY) license (<http://creativecommons.org/licenses/by/4.0/>).
